# Supplementary material
Source: publisher figshare collection journal article supplement (https://brill.figshare.com/ndownloader/files/25674713)
Supplement: Supplementary file 1 [file 25674713]

Appendix A

Alphabetical list of song titles or first lines

A Él sea la gloria

A ti cantaré

A ti sea la gloria

Abre mis ojos O Cristo

Al alto y sublime

Al que me ciñe de poder

Alábale quien vive

Alabaré

Aleluya

Aleluya gloria aleluya

Aleluya, Dios es Rey

Algo en mí necesita de Dios

Amén, amén

Amor sin condición

Aquí estoy

Así como David cantaba

Así como María hermana de Moisés

Así se siente el Espíritu

Ay Jerusalén que bonita

Bendito sea el Señor Dios poderoso

Bienvenido Santo Espíritu

Caminando

Canta al Señor toda la creación

Cantad a Jehová cántico nuevo

Cantaré a Jehová por siempre

Cántico nuevo

Como el ciervo brama

Con Cristo en la familia, que feliz hogar

Con mi Dios yo saltaré los muros

Con tu sangre nos has redimido

Conquistaremos las naciones

Coronado de Gloria

Creo en ti Jesús

Cristo está aquí

Cristo no está muerto, Él está vivo

Cristo te exalto

Cuán bello es el Señor

Cuán grande es Él

Cuando levanto mis manos

Cuando suene la trompeta

Dame de beber de tu manantial

Dame la mano

Damos honor a ti

Debajo de mis pies Satanás está

Declaramos tu majestad

Dios el más grande y digno de alabar

Dios está aquí

Dios ha sido bueno

Dios tiene cuidado de mí

Dondé está el Espíritu de Dios hay libertad

Dulce refugio

El cielo cae, cae

El enemigo vencido está

El Espíritu de Dios está en este lugar

El nombre de Jesús es poder

El poderoso de Israel

El río de Dios

El rubio de Galilea pasando va

El sacrificio

El Señor es mi rey, mi todo

El Señor me llenó de gozo

En el principio el Espíritu de Dios

En la presencia del Señor hay libertad

En la viña del Señor

Entrad por sus puertas con acción de gracias

Eres Dios

Eres mi amigo fiel

Eres mi respirar

Eres santo

Eres Señor

Es el Rey de los cielos

Eso es lo que me hace cantar

Espíritu Santo

Espíritu santo, caiga

Está cayendo su gloria sobre mí

Esta obra no va a parar

Ganaremos la batalla de las tinieblas

Gózate delante del Señor

Gózate en la presencia de Jehová

Gracias Cristo, gracias Cristo

Gracias O Cristo

Gracias, Jesus, por no haber bajado de la cruz

Grande es el Señor

Haré un altar para ti Desciende el fuego

Has cambiado mi lamento en baile

Hay gozo en la casa del Señor

Hay momentos que las palabras no alcanzan

Hay poder

Hay una fuente en mí

Hay una unción aquí

He guardado la fe

Heart of Worship

Ho-ho-hosana al Hijo de David

Hosana al Rey de salvación

Hosana al rey, Alelyua, Bendito el que viene en el nombre

How Great is Our God

Infinito Dios

Jehová es mi guerrero

Jehová está en su templo

Jesús amante de mi alma

Le llaman guerrero

León de la tribu de Judá

Levántate levántate Señor

Libre, Tú me hiciste libre

Libre, yo soy libre

Los cielos declaran

Los enemigos de Jehová están derrotados

Los muros caen

Los que esperan en Jehová

Maravillosa gracia

Maravilloso es

Me fortalecerá

Me gozaré en tu presencia

Mi pensamiento eres Tú Señor

Mi primer amor

Mi universo

Mía es la victoria

Mira que bonita es la nueva Jerusalén

No callaré

No hay nadie como Tu

No hay santo como el Señor

No puede el mundo ser mi hogar

No puede estar triste el corazón que alaba a Dios

No puedo parar de alabarte Cristo

No son dos, no son tres, Él es uno

O celebraré, me alegraré

O cuan dulce es fiar

O moradora de Sión

Oh, gracias, encontré la vida

Otro color

Palabras de verdad

Para andar con Jesús (Obedecer)

Para ti o Jehová

Pedro ¿me amas?

Pero ¡qué felicidad!

Pon aceite en mi vida

Por tu amor

Por una senda estrecha

Porque para siempre Dios tu misericordia es

Pues Tú glorioso eres Señor

Qué bueno es el Señor

Que no se acabe

Que sería de mi

Queremos ver

Quién, quién, quién como Jehova

Quiero llenar tu trono de alabanza

Rendir mi vida

Renuévame

Revísteme

Rey de Gloria

Santo, santo

Santo, santo, santo

Santo, santo, santo mi corazón te adora

Satúrame Señor con tu Espíritu

Seguiré a mi Jesús (Soy bautizado)

Señor eres fiel

Señor mi vida te necesita

Señor yo te quiero entregar lo mejor de mi vida

Si el Espíritu de Dios se mueve en mí

Si tuvieras fe como un grano de mostaza

Siempre estarás a mi lado

Siempre fiel

Siento tu gloria

Solamente en Cristo

Solo de Jesús la sangre

Sólo Tú

Somos el pueblo de Dios

Su gloria cubrió los cielos

Take All of Me

Te alabaré mi buen Jesús

Te alabaré para siempre

Te alabo, Señor

Te amo Dios y levanto

Te amo más que a estos

Te amo, te amo

Te doy gloria

Te exaltaré mi Dios Salmo 145

Te quiero ver

Todo es posible si puedes creer

Todo lo que respira

Todo se lo debo a él

Tu eres digno O Dios

Tu fidelidad

Tú mereces gloria y honra

Tu palabra

Va bajando ya

Vamos a alabar a Jehová con pandero y danza

Ven, es tiempo de adorarle

Ven, Espíritu, ven

Ven, ven, ven Espíritu divino

Vengo a adorarte

Venid todos y celebrad

Victoria, Él me ha dado la victoria

Vine a alabar a Dios

Y si yo danzo/giro. la gloria es para El

Yo confieso

Yo le alabo de corazón

Yo me rindo a Él

Yo no sé a lo que tú has venido, pero yo vine a alabar a Dios

Yo quiero más y más de Cristo

Yo sé que estás aquí para bendecirme

Yo te amo en el nombre(amor) del Señor

Yo venceré
